# Supplementary material for: Correlation between postmortem microbial signatures and substance abuse disorders
Source: PubMed Central journal article supplement (PMC9512198; doi:10.1371/journal.pone.0274401), 2022-09-26
Supplement: pone.0274401.s001.pdf [file pone.0274401.s001.pdf]

**Table S1. Demographic data were collected on each of the 40 corpses: ethnicity, height, weight, PMI, cause of death, manner of death, SUDs status, and drug substance.**

| Case Number | Ethnicity        | Height (cm) | Weight (kg) | PMI (days) | Cause of Death              | Manner of Death | Non-Drug Related | Drug Addicted | Substance                         |
|-------------|------------------|-------------|-------------|------------|-----------------------------|-----------------|------------------|---------------|-----------------------------------|
| Case-1      | Caucasian        | 160         | 65          | 5 days     | Thoracic Trauma             | Accident        | X                |               |                                   |
| Case-2      | Caucasian        | 176         | 65          | 7 days     | Sepsis                      | Natural Death   | X                |               |                                   |
| Case-3      | Caucasian        | 160         | 47          | 3 days     | Cardiac Rupture             | Natural Death   | X                |               |                                   |
| Case-4      | Caucasian        | 176         | 90          | 6 days     | Drug Overdose               | Accident        |                  | X             | Methadone-ketamine                |
| Case-5      | Caucasian        | 163         | 55          | 3 Days     | Acute Cocaine Intoxication  | Accident        |                  | X             | Cocaine/methadone                 |
| Case-6      | Caucasian        | 160         | 70          | 4 Days     | Drug Overdose               | Accident        |                  | X             | Cocaine-morphine                  |
| Case-7      | Caucasian        | 178         | 80          | 1 Day      | Ischemic Heart Disease      | Accident        | X                |               |                                   |
| Case-8      | Caucasian        | 177         | 75          | 7 Days     | Hemorrhagic Shock           | Accident        |                  | X             | Cocaine                           |
| Case-9      | Caucasian        | 177         | 95          | 4 Days     | Acute Cardiac Failure       | Natural Death   | X                |               |                                   |
| Case-10     | Caucasian        | 177         | 80          | 8 Days     | Drug Overdose               | Accident        |                  | X             | Cocaine                           |
| Case-11     | Caucasian        | 167         | 85          | 2 Days     | Drug Overdose               | Accident        |                  | X             | Cocaine-morphine                  |
| Case-12     | Caucasian        | 181         | 100         | 5 Days     | Cardiac Failure             | Natural Death   | X                |               |                                   |
| Case-13     | Caucasian        | 174         | 75          | 5 Days     | Acute Myocardial Ischemia   | Accident        | X                |               |                                   |
| Case-14     | Caucasian        | 180         | 70          | 2 Days     | Drug Overdose               | Accident        |                  | X             | Heroin                            |
| Case-15     | Caucasian        | 173         | 80          | 7 Days     | Cardiac Failure             | Natural Death   | X                |               |                                   |
| Case-16     | African American | 180         | 60          | 10 Days    | Drowning                    | Accident        |                  | X             | Alcohol                           |
| Case-17     | Caucasian        | 175         | 59          | 1 Day      | Esophageal Varices Bleeding | Natural Death   | X                |               |                                   |
| Case-18     | Caucasian        | 147         | 60          | 5 Days     | Respiratory Failure         | Accident        | X                |               |                                   |
| Case-19     | Caucasian        | 172         | 70          | 3 Days     | Drug Overdose               | Accident        |                  | X             | Heroin/cocaine                    |
| Case-20     | Caucasian        | 180         | 56          | 4 Days     | Drug Overdose               | Accident        |                  | X             | Methadone-cocaine-benzodiazepines |
| Case-21     | Caucasian        | 172         | 80          | 3 Days     | Acute Myocardial Ischemia   | Accident        | X                |               |                                   |
| Case-22     | Caucasian        | 180         | 75          | 6 Days     | Acute Myocardial Infarction | Natural Death   | X                |               |                                   |
| Case-23     | Caucasian        | 169         | 68          | 7 Days     | Hemorrhagic Shock           | Accident        |                  | X             | Cocaine-morphine                  |
| Case-24     | Caucasian        | 179         | 95          | 3 Days     | Acute Cocaine Intoxication  | Accident        |                  | X             | Cocaine                           |
| Case-25     | Caucasian        | 179         | 65          | 2 Days     | Asphyxia (Hanging)          | Suicide         |                  | X             | Cocaine                           |
| Case-26     | Caucasian        | 161         | 68          | 3 Days     | Sudden Cardiac Death        | Accident        | X                |               |                                   |
| Case-27     | Caucasian        | 183         | 75          | 4 Days     | Drug Overdose               | Accident        |                  | X             | Cocaine                           |
| Case-28     | Caucasian        | 174         | 60          | 2 Days     | Acute Heroine Intoxication  | Accident        |                  | X             | Cocaine                           |
| Case-29     | Caucasian        | 164         | 60          | 5 Days     | Acute Cardiac Failure       | Natural Death   |                  | X             | Unknown/alcohol                   |
| Case-30     | Caucasian        | 173         | 80          | 7 Days     | Cardiac Failure             | Natural Death   | X                |               |                                   |
| Case-31     | Caucasian        | 168         | 68          | 2 Days     | Acute Cardiac Insufficiency | Natural Death   | X                |               |                                   |
| Case-32     | Caucasian        | 179         | 70          | 9 Days     | Drug Overdose               | Natural Death   | X                |               |                                   |
| Case-33     | Caucasian        | 180         | 72          | 3 Days     | Drug Overdose               | Accident        |                  | X             | Methadone-cocaine-benzodiazepines |
| Case-34     | Caucasian        | 175         | 64          | 3 Days     | Head Trauma                 | Accident        | X                |               |                                   |
| Case-35     | Caucasian        | 176         | 140         | 2 Days     | Drug Overdose               | Accident        |                  | X             | Cocaine, heroine, oxycodone       |
| Case-36     | Caucasian        | 177         | 67          | 5 Days     | Drug Overdose               | Accident        |                  | X             |                                   |
| Case-37     | Caucasian        | 181         | 80          | 17 Days    | Hemorrhagic Shock           | Accident        | X                |               |                                   |
| Case-38     | Caucasian        | 172         | 80          | 5 Days     | Pulmonary Thromboembolism   | Natural Death   | X                |               |                                   |
| Case-39     | Caucasian        | 149         | 40          | 4 Days     | Bilateral Pneumonia         | Natural Death   | X                |               |                                   |
| Case-40     | Caucasian        | 170         | 65          | 10 Days    | Drug Overdose               | Accident        |                  | X             | Heroin, cocaine, benzodiazepamine |

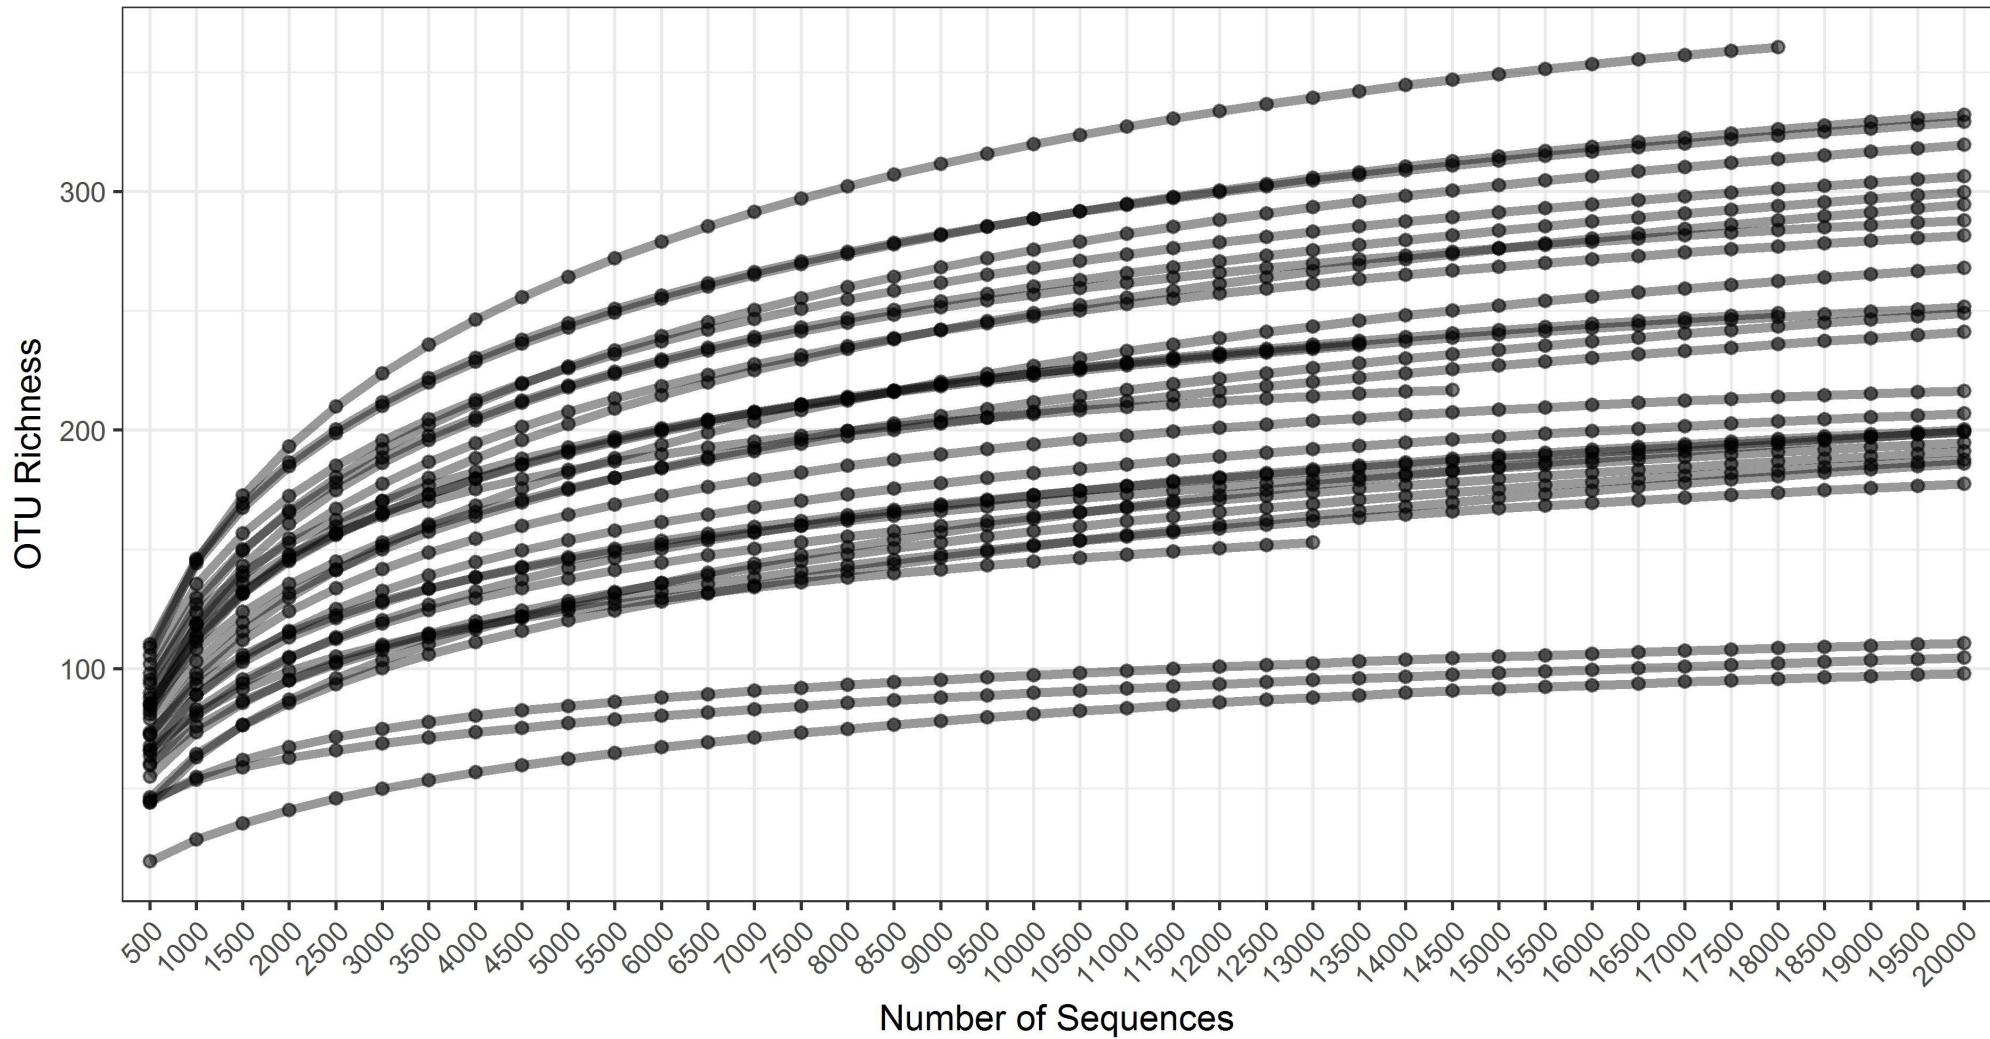

**S1 Fig.** Rarefaction survey to determine the sequencing depth to a minimum depth of 10,000 reads required to characterize microbial communities. Each curve reached asymptote indicative of adequate reads for comparison of the microbiomes.

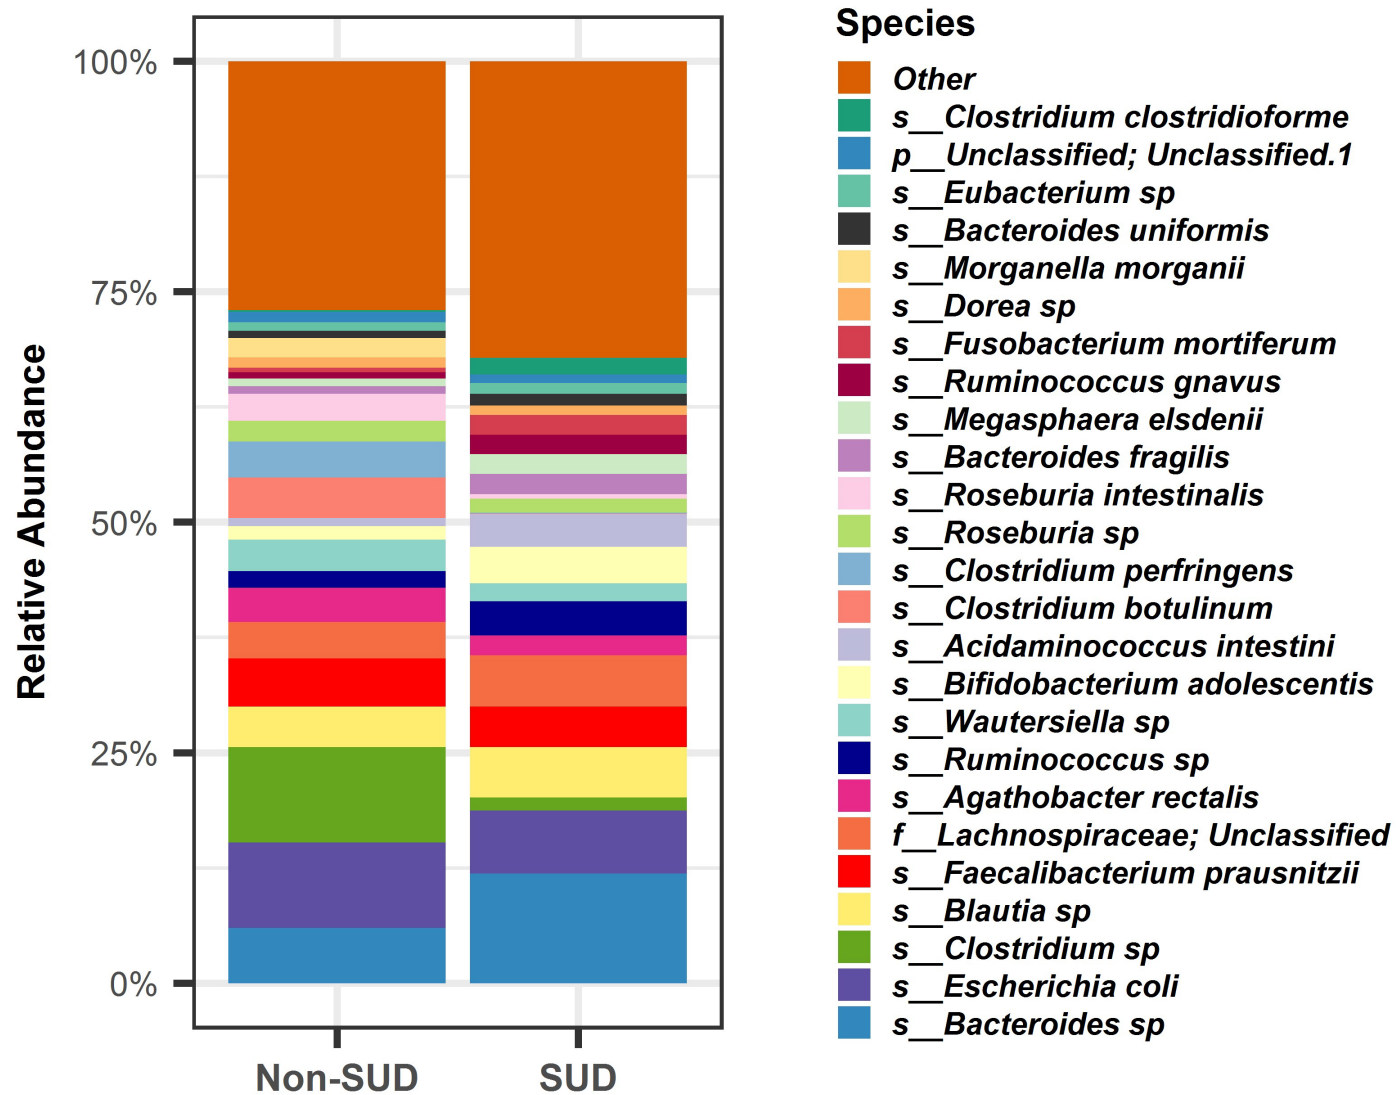

**S2 Fig.** Microbiome profile of the samples for SUD and non-SUD cases. Shown are the 25 most predominant species based on the relative abundance of per group.

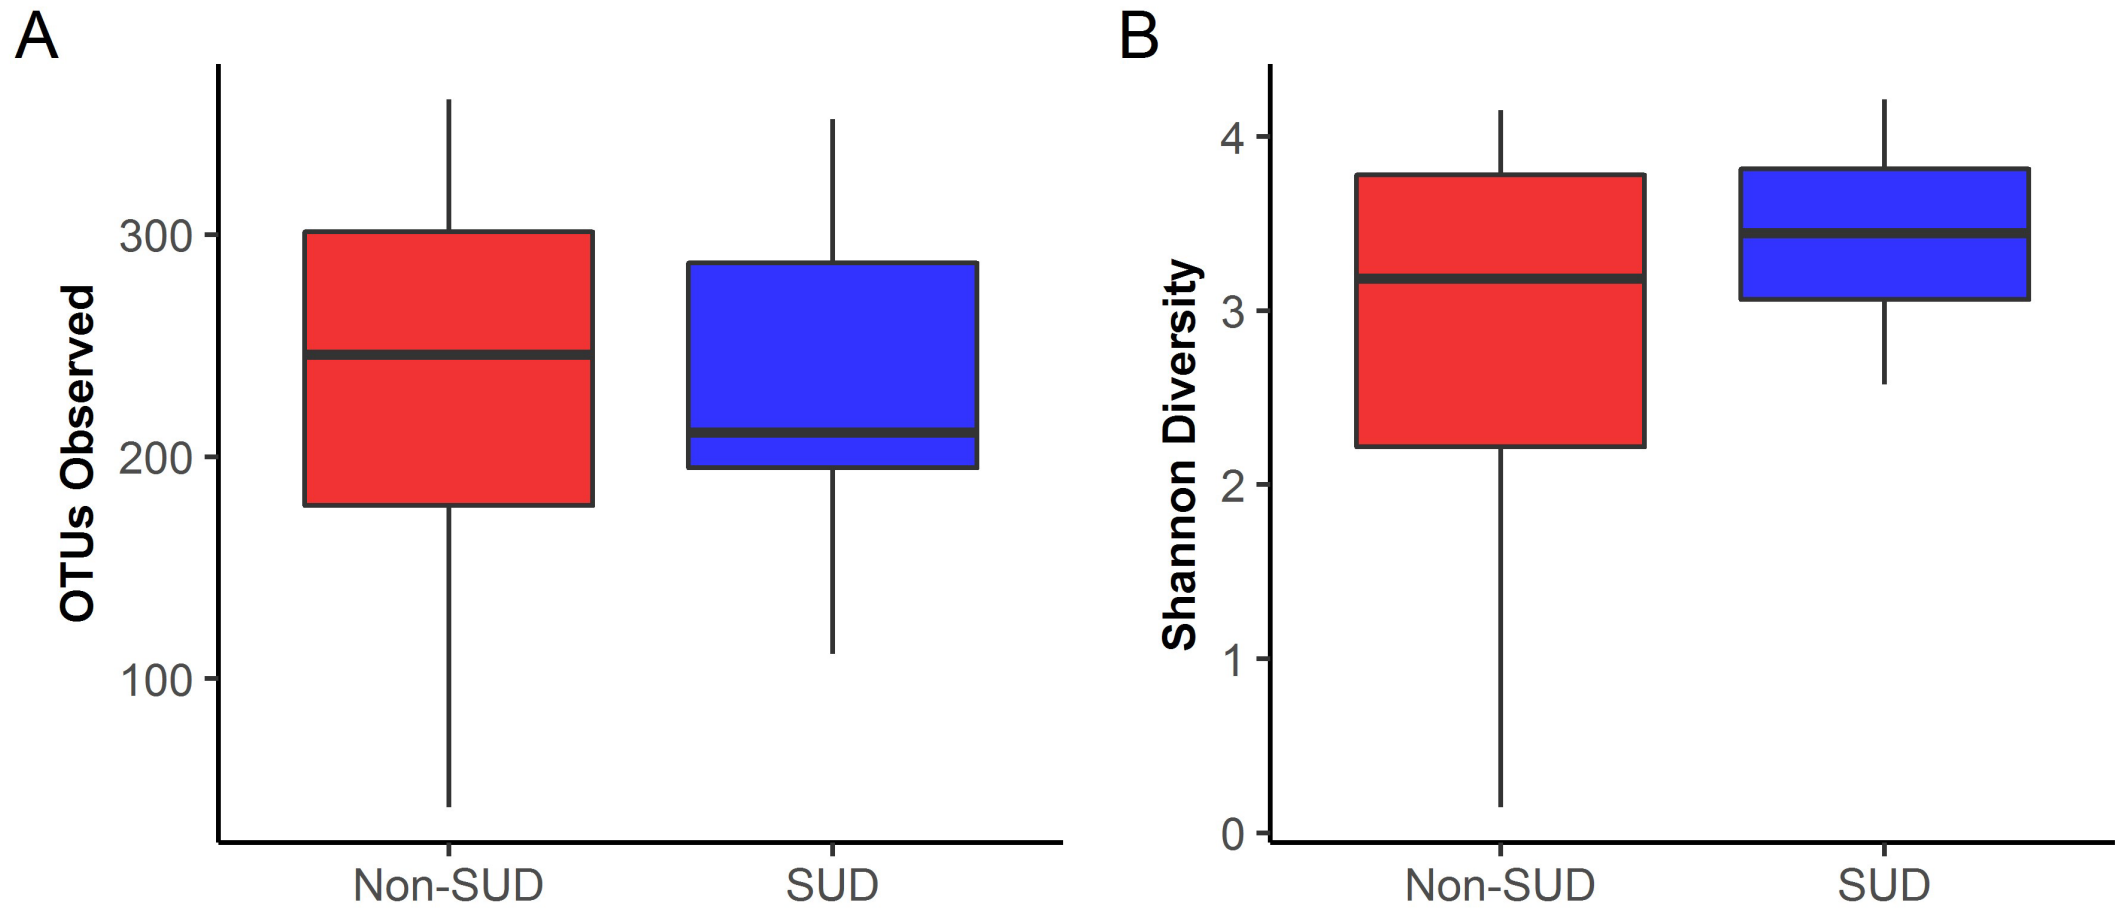

**S3 Fig.** Boxplots of alpha diversity depicting the relationship of A) non-SUD and SUD cases with OTU richness and B) non-SUD and SUD cases with Shannon Diversity.
